# Supplementary material for: Molecular Pathway-Based Classification of Ectodermal Dysplasias: First Five-Yearly Update
Source: MDPI journal article supplement (doi:10.3390/genes13122327), 2022-12-10
Supplement: s1 [file s1]

**Table S1. Reported disease entities for which the genetic background has not yet been elucidated.**

-, authors contacted repeatedly but no response received; +, contacted and reply received, but still awaiting more detailed information; --, clarified that no more information is available; x, no contact available.

| Disease(s) / Syndrome(s)                                                                                         | OMIM No. | OMIM entries | Pubmed entries | Last paper | Authors' reply |
|------------------------------------------------------------------------------------------------------------------|----------|--------------|----------------|------------|----------------|
| Arthritis and interstitial granulomatous dermatitis (Ackerman syndrome)                                          | 200970   | 1            | 5              | 2017       | -              |
| Acrorenal field defect, ectodermal dysplasia, lipoatrophic diabetes, and other manifestations (AREDYLD) syndrome | 207780   | 2            | 3              | 1992       | +              |
| Alopecia, contractures, dwarfism, and mental retardation syndrome                                                | 203550   | 4            | 5              | 2008       | --             |
| Ameloonychohypohidrotic syndrome                                                                                 | 104570   | 3            | 2              | 1975       | +              |
| Anonychia-onychodystrophy with brachydactyly type b and ectrodactyly                                             | 106990   | 2            | 1              | 1986       | +              |
| Anonychia with flexural pigmentation                                                                             | 106750   | 1            | 1              | 1975       | +              |
| Arthrogryposis and ectodermal dysplasia                                                                          | 601701   | 7            | 4              | 2010       | -              |
| Book syndrome                                                                                                    | 112300   | 2            | 1              | 1950       | --             |
| Brachymetapody, anodontia, hypotrichosis, and albinoidism                                                        | 211370   | 1            | 1              | 1968       | -              |
| Cataract, hypotrichosis, and mental retardation (CAHMR) syndrome                                                 | 211770   | 1            | 1              | 1991       | -              |
| Cerebellar ataxia and ectodermal dysplasia                                                                       | 212835   | 5            | 2              | 1993       | --             |
| Corneo-dermato-osseous syndrome                                                                                  | 122440   | 3            | 3              | 1984       | -              |
| Deafness with anhidrotic ectodermal dysplasia                                                                    | 125050   | 2            | 2              | 1951       | -              |
| Dermatoosteolysis, Kirghizian type                                                                               | 221810   | 1            | 1              | 1983       | -              |
| Dermodontodysplasia                                                                                              | 125640   | 2            | 2              | 1990       | -              |
| Ectrodactyly and ectodermal dysplasia without cleft lip/palate                                                   | 129810   | 1            | 1              | 1988       | +              |
| Ectodermal dysplasia, hidrotic, Christianson-Fourie type                                                         | 601375   | 1            | 1              | 1996       | +              |
| Ectodermal dysplasia, hypohidrotic, with hypothyroidism and agenesis of the corpus callosum                      | 225040   | 3            | 3              | 1996       | -              |
| Ectodermal dysplasia, hypohidrotic, hypothyroidism and ciliary dyskinesia                                        | 225050   | 4            | 1              | 1986       | --             |
| Ectodermal dysplasia, trichodontoonychial type                                                                   | 129510   | 2            | 1              | 1996       | -              |
| Ectodermal dysplasia with adrenal cyst                                                                           | 129550   | 1            | 1              | 1983       | -              |
| Ectodermal dysplasia with natal teeth, Turnpenny type                                                            | 601345   | 2            | 1              | 1995       | -              |
| Johnson neuroectodermal syndrome                                                                                 | 147770   | 5            | 5              | 2014       | --             |
| Oculotrichodysplasia (OTD)                                                                                       | 257960   | 1            | 1              | 1988       | -              |
| Odonto-tricho-ungual-digital-palmar syndrome                                                                     | 601957   | 1            | 1              | 1998       | -              |
| Odontomicronychial dysplasia                                                                                     | 601319   | 1            | 1              | 1996       | -              |
| Onychotrichodysplasia and neutropenia                                                                            | 258360   | 3            | 1              | 1991       | --             |
| Pilodental dysplasia with refractive errors                                                                      | 262020   | 1            | 1              | 1985       | -              |
| Sener syndrome                                                                                                   | 606156   | 4            | 1              | 1997       | +              |
| Teeth, congenital absence of, with taurodontia and sparse hair                                                   | 272980   | 4            | 1              | 1973       | +              |
| Tetramelic deficiencies, ectodermal dysplasia, deformed ears, and other abnormalities                            | 273400   | 4            | 1              | 1989       | +              |
| Thumb deformity and alopecia                                                                                     | 188150   | 3            | 1              | 1988       | -              |
| Trichodontal dysplasia                                                                                           | 601453   | 4            | 2              | 1987       | +              |
| Trichodontoonychial dysplasia with bone deficiency                                                               | 275450   | 1            | 1              | 1983       | +              |
| Uncombable hair, retinal pigmentary dystrophy, dental anomalies, and brachydactyly                               | 191482   | 2            | 1              | 1987       | -              |
| Ectodermal Dysplasia And Neurosensory Deafness                                                                   | 224800   | 1            | 1              | 1970       | x              |
| Ectodermal dysplasia-syndactyly syndrome 2                                                                       | 613576   | 1            | 1              | 2009       | x              |
| Polyposis, Skin Pigmentation, Alopecia, And Fingernail Changes                                                   | 175500   | 5            | 5              | 2012       | x              |
| Rosselli-Gulienetti Syndrome                                                                                     | 225000   | 3            | 3              | 1994       | x              |
| Woolly Hair, Hypotrichosis, Everted Lower Lip, And Outstanding Ears                                              | 278200   | 1            | 1              | 1963       | x              |
